# Supplementary material for: Gonadotrope androgen receptor mediates pituitary responsiveness to hormones and androgen-induced subfertility
Source: JCI journal article supplement (doi:10.1172/jci.insight.127817), 2019-08-08
Supplement: sd1 [file 1]

## Suppl. Figure 1

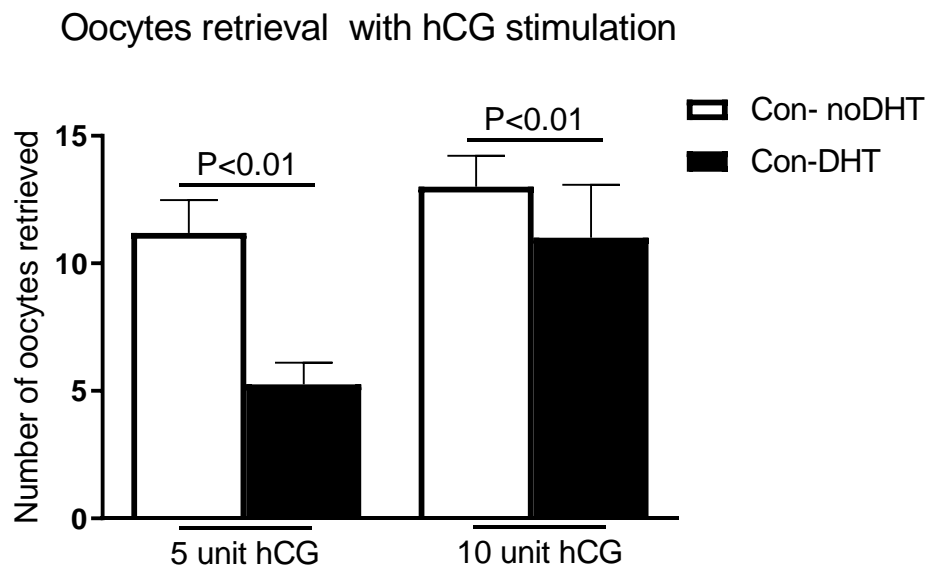

### Suppl. 1. Superovulation and egg retrieval.

Female mice were administered 5IU or 10IU of human chorionic gonadotropin (hCG) and were euthanized between 14-16h after the hCG injection. The cumulus-oocyte complexes (COCs) and oocytes were counted. There were significantly reduced number of oocytes in DHT treated mice with 5 IU hCG stimulation compared to no DHT treated mice. N=4-5, Error bar= SEM, standard error mean. Data were compared by two-tailed student t-test.

## Suppl. Figure 2

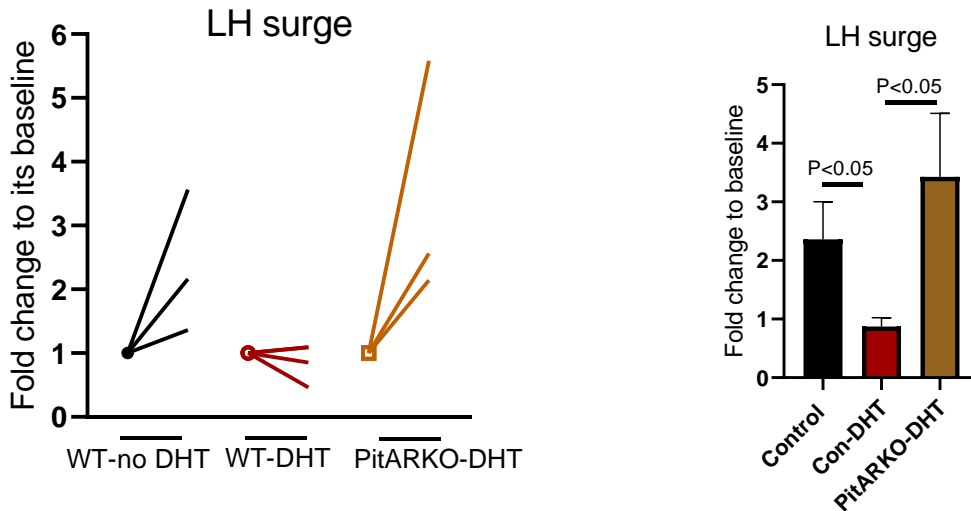

**Suppl. Figure 2. LH surge after OVX with DHT and E2 treatment.** Blood was collected at 10am, 8pm and 9pm. LH levels at 10 am were low at values similar to the basal level of mice before OVX, therefore, the LH level at 10am was used as the baseline. LH surges were expressed as fold change above base line. N=3 mice per group. Error bars=SEM. Data were compared by two-tailed student t-test.

### Suppl. Figure 3

#### LH fold change after GnRH stimulation

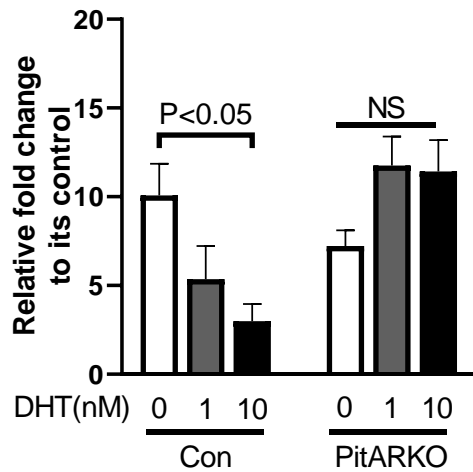

**Suppl. Figure 3. LH fold change after GnRH stimulation.**

LH fold change was calculated as LH levels after GnRH stimulation compared to LH levels without GnRH stimulation (3 independent experiments) from cell culture of pooled primary pituitaries (control mice or PitARKO mice). Data were compared by one-way ANOVA followed by Tukey's post hoc test. N=3 (total number of pituitaries=6-9).
